# Supplementary material
Source: publisher site journal article supplement (http://www.kjim.org/upload/media/kjim-2020-470-suppl3.pdf)
Supplement: Supplementary file 1 [file kjim-2020-470-suppl3.pdf]

**Supplementary Table 3. Oxygen use restrictions in patients with acute dyspnea at discharge**

| Variable                                         | No. (%)  |
|--------------------------------------------------|----------|
| Oxygen use restriction (yes)                     | 9 (30.0) |
| When to restrict oxygen use in patients? (n = 9) |          |
| During sleep                                     | 2 (22.2) |
| During exercise                                  | 6 (66.7) |
| Use only for dyspnea                             | 1 (11.1) |
